# Rapid Rerouting of Myosin Traffic at the T Cell Immunological Synapse

Robert Mąka<sup>a,b,e,1</sup>, Natalia Plewa<sup>a,c,1</sup>, Urszula Cichoń<sup>a,b</sup>, Katarzyna Krysztofiak<sup>a,d</sup>, Jagoda J. Rokicka<sup>a,d,f</sup>, Ronald S. Rock<sup>a,2</sup>

<sup>a</sup>Dept. of Biochemistry and Molecular Biology The University of Chicago Chicago IL 60637 USA

<sup>b</sup>Faculty of Biochemistry Biophysics and Biotechnology Jagiellonian University 31-007 Kraków Poland

<sup>c</sup>Dept. of Protein Engineering University of Wrocław 50-137 Wrocław Poland

<sup>d</sup>Faculty of Biology University of Warsaw 00-927 Warsaw Poland

<sup>e</sup>Current Address: Dept. of Immunology University Hospital Zurich University of Zurich 8091 Zurich Switzerland

<sup>f</sup>Current Address: Dept. of Biochemistry University of Oxford Oxford OX1 3QU United Kingdom

---

## Abstract

Cytoskeletal motors travel in patterns set by the architecture of their tracks. Nevertheless, we have a limited understanding of how cells dynamically reorganize their traffic patterns in response to signaling events. To investigate cytoskeletal motor rerouting, we used T cells as a model system. Upon an encounter between a T cell and an antigen presenting cell, the T cell builds a specialized interface with spatially organized immunoreceptors and adhesion molecules called the immunological synapse (IS). The IS also constructs new actin networks within minutes that define the synaptic structure. Here we track the movements of single myosin motors along presynaptic and synaptic actin networks of the T cell. We find that both myosin-5 and myosin-6 reroute after IS construction. For example, most myosin-5 traffic moves inward at the IS, although most of the IS actin filaments have a barbed end out orientation. This anomalous myosin-5 traffic pattern indicates that the IS makes two types of actin networks: a structural network that controls IS shape, and a distinct trafficking network that supports myosin motility. We disrupt these trafficking networks with chemical probes against actin, which inhibits the appearance of cell surface markers of T cell activation. Our results highlight the importance of the sparse actin networks at the center of the IS in T cell function.

---

## Introduction

T cells form specialized contacts with other cells, which is essential for their maturation and effector function. For example, T cells activate when they contact antigen presenting cells (APCs) displaying antigens in the early stages of the adaptive immune response. One of the early events in T cell activation is the construction of an immunological synapse (IS) with the APC [23, 43]. This synapse focuses signaling between the two cells and helps ensure the fidelity of T cell activation. The IS is a prominent actin-based structure of concentric rings that the T cell constructs within minutes [46, 31]. After activation, T cells undergo clonal expansion and differentiation, and ultimately carry out effector functions throughout the body.

---

\*Corresponding author

Email addresses: [robert.maka@uzh.ch](mailto:robert.maka@uzh.ch) (Robert Mąka), [nataliaplewa@gmail.com](mailto:nataliaplewa@gmail.com) (Natalia Plewa), [ucichon@uchicago.edu](mailto:ucichon@uchicago.edu) (Urszula Cichoń), [krysztofiak@uchicago.edu](mailto:krysztofiak@uchicago.edu) (Katarzyna Krysztofiak), [jagoda.rokicka@bioch.ox.ac.uk](mailto:jagoda.rokicka@bioch.ox.ac.uk) (Jagoda J. Rokicka), [rrock@uchicago.edu](mailto:rrock@uchicago.edu) (Ronald S. Rock)

<sup>1</sup>Equal contribution

<sup>2</sup>Corresponding author

16 Activated T cells also create synapses as part of their effector function. Cytotoxic  
17 CD8<sup>+</sup> T cells scan tissues searching for cells that display viral antigens on their major  
18 histocompatibility complexes (MHCs). When the T cell encounters this virus-infected cell,  
19 it forms a synapse to focus secretion of cytotoxic components (granzymes and perforins)  
20 to the infected cell. Likewise, helper CD4<sup>+</sup> T cells form synapses to secrete cytokines  
21 for paracrine regulation of other immune cells [17]. Thus, the synapse is a structure of  
22 central importance in immune system function. Moreover, the T cell may tune features  
23 of its IS structure to support specific effector functions [42].

24 The IS structure allows the T cell to form a seal with and to focus its responses toward  
25 a specific cell. In general, the IS forms three zones in a series of concentric rings called  
26 the distal-, proximal-, and central supramolecular activation clusters (dSMAC, pSMAC,  
27 and cSMAC) [46]. Each zone has its own set of cell surface markers and specialized actin  
28 filament networks [10, 26]. Construction of the IS requires careful coordination of actin  
29 polymerization and myosin motor activity [19, 47, 25, 29].

30 Because the IS is a structure with rich and functionally important cytoskeletal dynam-  
31 ics, we wondered how myosin transport systems evolve over the course of IS formation.  
32 The role of nonmuscle myosin-2A in establishing the structure of the dSMAC and pSMAC  
33 is by now well understood [47, 29]. However, the activity of transport myosins such as  
34 myosin-5 and myosin-6 at the IS is unknown.

35 To answer questions such as these, we have developed a motility assay that allows us  
36 to track myosin movements along cellular actin filaments. Much like the original *Nitella*  
37 motility assay [38], we open cells and expose their actin to labeled myosins for tracking.  
38 We call this the *ex vivo* motility assay to refer to the source of the actin filaments. Several  
39 groups have used this *ex vivo* motility approach to study various systems [7, 41, 8, 20].  
40 By tracking single myosins along actin from single cells, we learn how the cell patterns  
41 its actin and how the myosin responds.

42 Here, we apply this functional imaging approach to show how T cells remodel their  
43 myosin traffic patterns along with their actin networks at the immunological synapse.  
44 We find that myosins reroute their traffic after T cell activation: myosin-5 switches from  
45 centrifugal to centripetal movement, while myosin-6 switches from centripetal to circu-  
46 latory movement. Small molecule inhibitors of actin network structure and function also  
47 perturb the traffic of these myosins. One inhibitor in particular affects the display of cell  
48 surface markers of T cell activation. Together, we find that T cells regulate and redirect  
49 myosin traffic during IS construction and T cell activation.

## 50 Results

### 51 *Myosin-5 travels outward in resting T cells but inward at the immunological synapse*

52 To image the actin networks and myosin traffic at the mature immunological synapse,  
53 we use a common approach with antibody-coated coverslips to begin synapse formation  
54 in the image plane [24, 28, 47]. One antibody binds and activates through CD3, while a  
55 second antibody binds CD28 to provide a co-stimulatory interaction (mouse anti-human  
56 OKT3 and CD28.2 antibodies, respectively). We omit the anti-CD3 antibody in our non-  
57 activating control condition. We apply T cells to these coverslips, allow cells to adhere  
58 or synapses to form, and then fix the actin in place and remove the plasma membrane.

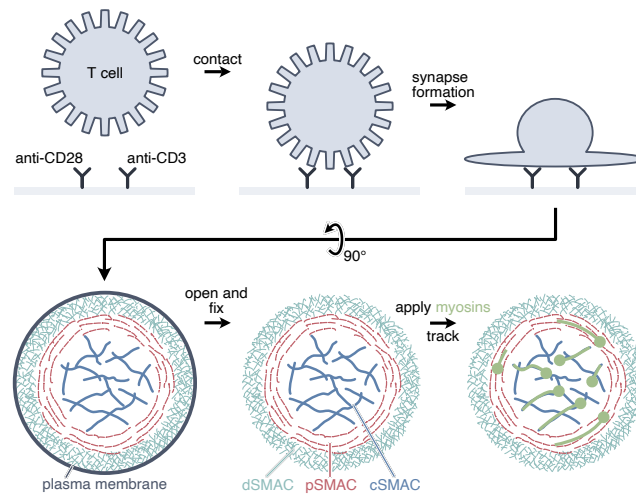

Figure 1: **The *ex vivo* motility assay scheme applied to the immunological synapse.** We apply lymphocytes (Jurkat T cells, human PBMCs, or CD8<sup>+</sup> T cells from PBMCs) to a coverslip coated with activating antibodies. After contact with an activating surface, an immunological synapse forms within 5 min. We then open the cell with detergent and stabilize and label the actin filaments to visualize the synapse. Finally, we apply fluorophore-labeled myosin motors (myosin-5 or myosin-6) and track their movements through the synapse. Perturbations include activating vs. non-activating surfaces (anti-CD3/CD28 vs anti-CD28 alone) and small molecule inhibitors of actin filament assembly and function (CK666 and TR100).

59 We then add labeled myosin-5 or myosin-6 for tracking by total internal reflection mi-  
60 croscopy (Fig. 1). Under these conditions, we detect hundreds to thousands of runs  
61 per cell over several minutes. Our complete dataset includes recordings from 511 cells  
62 and 340,000 myosin runs, distributed over activation surfaces, cell type, and cytoskeletal  
63 inhibitor treatments (Supp. Table S1).

64 On non-activating anti-CD28 surfaces, Jurkat T cells adhere but do not remodel their  
65 actin networks to form synapses. Examples of these resting cells and their myosin-5 runs  
66 appear in Fig. 2A, top, and Video S1. To show where myosin-5 commences runs we  
67 calculate the myosin landing density, a kernel density estimate obtained from the start-  
68 ing points of all runs. Although myosin-5 travels throughout the cell, it concentrates on  
69 surface-attached microvilli projecting out from the edge of the cell. Myosin-5 travels out,  
70 away from the cell center and toward the tips of the microvilli, as shown in the colored  
71 traces shown in the second row of Fig. 2A. The barbed-end-out polarity of the actin core of  
72 the microvillus sets this outward movement, as myosin-5 is a barbed-end directed myosin.

73 On the activating anti-CD3/CD28 surfaces, the Jurkat cells form synapses. Over sev-  
74 eral minutes, new actin polymerizes at the distal edge to fill out the space between mi-  
75 crovilli with a dense network (the dSMAC / pSMAC, see Fig. 1). We find anomalous  
76 inward-directed myosin-5 motility on these synapses (Fig. 2A–C and Video S2). This in-  
77 ward heading is inconsistent with the known barbed-end-out orientation of the Arp2/3  
78 nucleated networks at the edge of the IS. Indeed, our own recordings of actin filament  
79 polymerization upon IS formation show the stereotypical pattern of barbed-end-out actin  
80 nucleation and retrograde flow at the outer edge (Video S3) [47]. However, most inward

81 myosin-5 runs occur in the hypodense actin network at the center of the synapse (the cS-  
82 MAC), rather than in the outer and more dense lamellopodial actin. Myosin-5 selects this  
83 low-density central network [47], which has a majority of filaments with a barbed-end-  
84 in orientation as indicated by the direction of the myosin-5 runs. Presynaptic cells have  
85 net-outward myosin-5 traffic, while synaptic cells have net-inward myosin-5 traffic (Fig.  
86 2B).

#### 87 *The reverse gear myosin-6 motor also reroutes at the synapse*

88 Myosin-6 is a second class of processive myosins that travels toward the pointed end  
89 of actin filaments, unlike myosin-5 and all other characterized myosins [44, 35]. This  
90 functional difference led us to believe that myosin-6 might differ in its actin network pref-  
91 erences and motility at the IS, which motivated similar myosin-6 tracking experiments.  
92 On the anti-CD28 surfaces myosin-6 tends to move inward, as seen in the predominantly  
93 red runs in Fig. 3A (see also Video S4). Microvilli support frequent inward myosin-6 runs,  
94 again consistent with the known polarity of these actin-based protrusions.

95 On the anti-CD3/CD28 surfaces, myosin-6 travels nearly isotropically (Fig. 3A and  
96 Video S5). The mean cellular heading distribution has two balanced and less prominent  
97 lobes (Fig. 3B). The heading distribution for all runs (Fig. 3C) is also nearly isotropic,  
98 although with a preference for circulation (ellipsoidal distribution with maxima at  $90^\circ$  /  
99  $270^\circ$ ). The observation that the myosin-6 headings do not mirror those of myosin-5 is  
100 evidence that these two myosins select different actin networks that differ in orientation.  
101 Myosin-6 lands more evenly throughout the T cell compared to myosin-5, in particular  
102 on the lamellopodial actin of the IS.

#### 103 *Myosin headings depend upon the radial location within the cell*

104 The immunological synapse constructs three zones of signaling molecules called the  
105 supramolecular activation clusters, which vary in actin network architecture (Fig. 1, bot-  
106 tom) [18]. The outermost zone (the dSMAC) has Arp2/3 dendritic actin oriented with  
107 their barbed ends out. The intermediate zone (the pSMAC) has circumferential bands of  
108 actin that bundle and contract under nonmuscle myosin-2 activity. Finally, the central  
109 zone (the cSMAC) is hypodense and poorly characterized. Because the actin orientations  
110 vary in these three zones, we next examined whether we could detect myosin rerouting  
111 across the zones.

112 Upon synapse formation, both myosin-5 and myosin-6 landing events shift out from  
113 the cell center but to a differing extent (Fig. 4A). One significant contributor to this  
114 shift is the nucleation of new actin between microvilli, which increases the accessible  
115 area for myosin runs at the outer extent of the cell. With anti-CD28 surfaces, myosin-6  
116 runs concentrate in the interior of the cell. This concentration may reflect myosin-6's  
117 preference for older actin at the interior of the cell [48].

118 To distinguish myosin motility across the SMACs, we divided the myosin runs into  
119 three radial zones—central, proximal, and distal—and investigated the heading distribu-  
120 tions within each of the three (Fig. 4B). On the anti-CD28 surfaces, both myosins are  
121 strongly polarized (5:out and 6:in) in the distal zone containing the microvilli. That pol-  
122 arization decays to isotropic motility through the proximal and into the central zones. On  
123 the anti-CD3/CD28 surfaces, myosin-5 moves inward in the central and proximal zones,



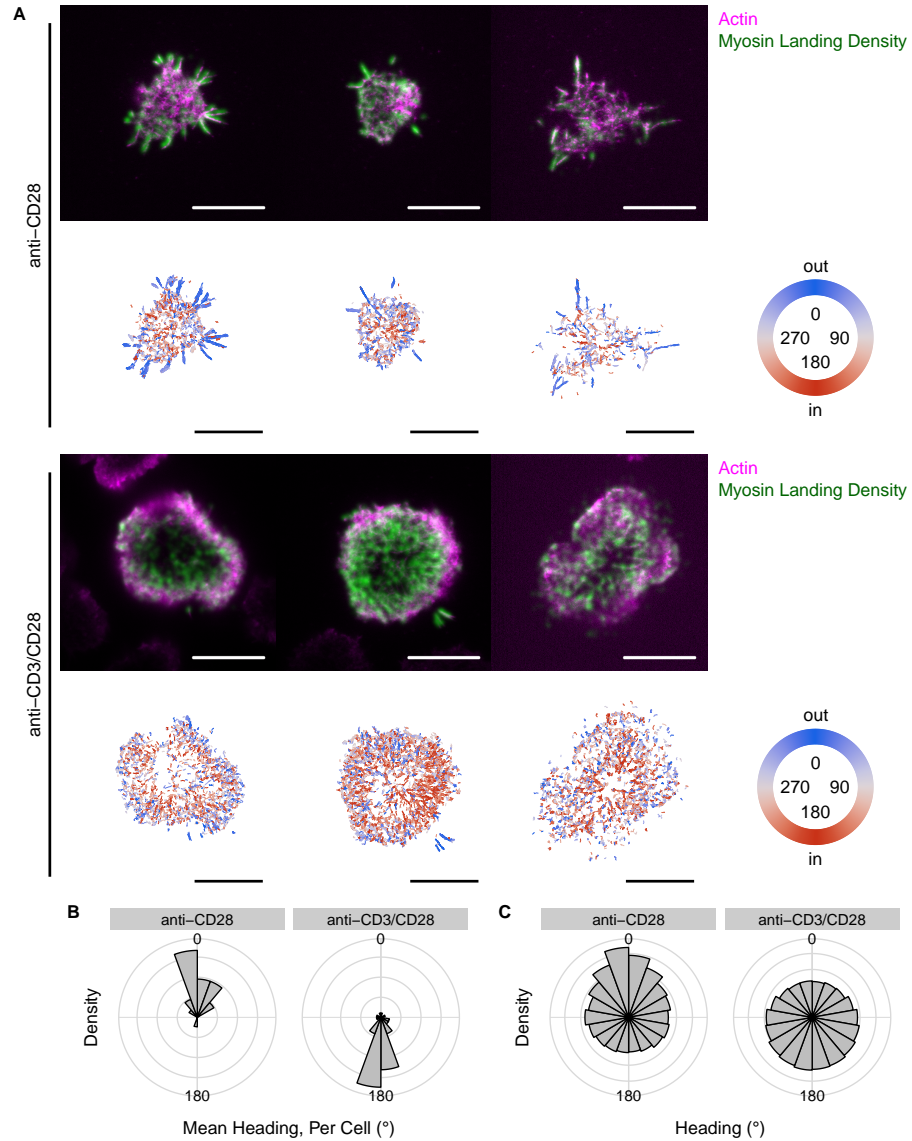

Figure 2: **Myosin-5 reverses direction, heading inward at the immunological synapse.** (A) Representative Jurkat T cells in contact with non-activating (anti-CD28) or activating (anti-CD3/CD28) surfaces. The top row of each set shows actin (TMR-phalloidin staining) and a kernel density estimate of the myosin-5 landing events. The bottom row in each set shows the detected runs, colored by heading. Headings of 0° run out from the cell center, while headings of 180° run in toward the cell center. Rose plots show the distributions (PDFs) of mean headings on a cell-by-cell basis (B), and headings for all runs collectively (C). Both measures show the reversal of myosin-5 headings on the activating surfaces. All four distributions in (B, C) are nonuniform (Watson test of uniformity;  $U^2 = 0.73, 0.82, 13, 3.3$ ;  $p < 0.01$  for each). The heading distributions also differ within (B) and within (C) (Watson-Wheeler test of homogeneity;  $W = 27, 570$ ;  $p = 9 \times 10^{-7}, < 2 \times 10^{-16}$ ). Scale bars, 10  $\mu\text{m}$ .

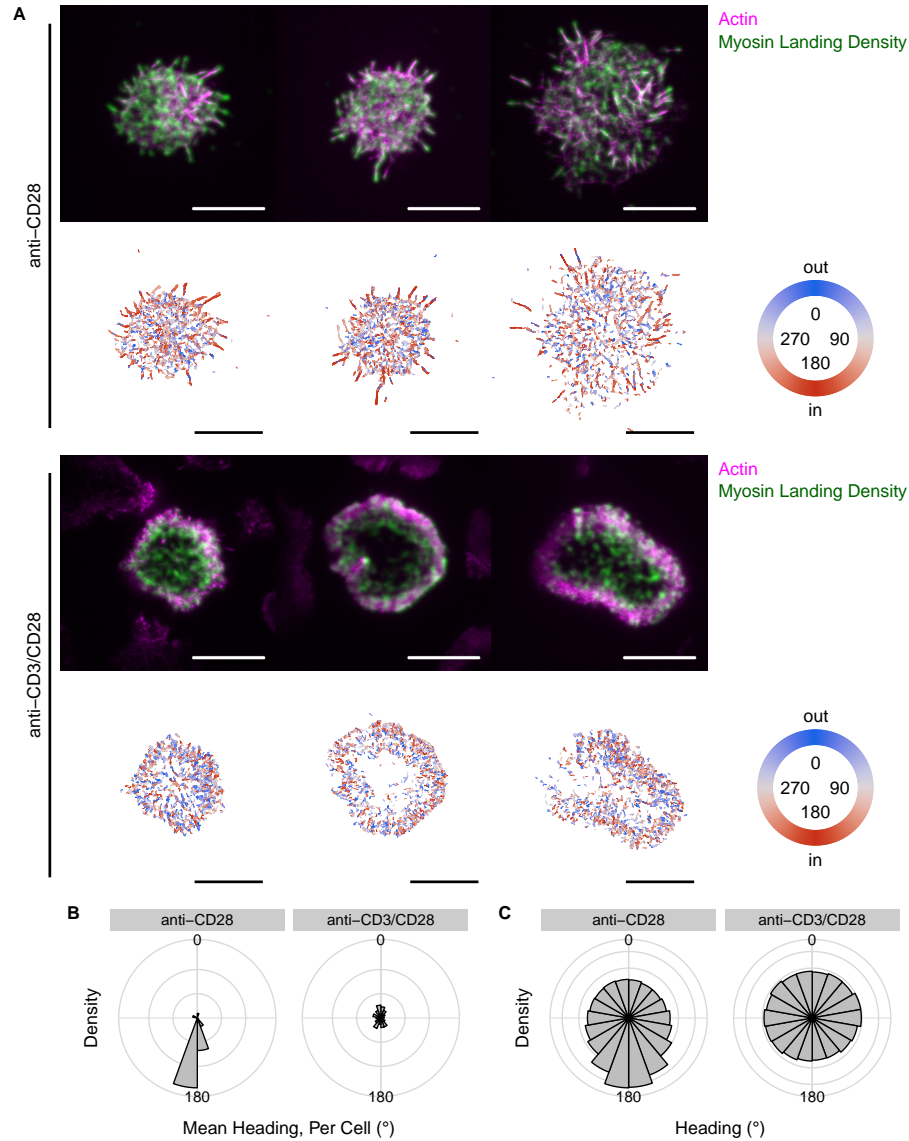

**Figure 3: Myosin-6 transitions from inward to nearly isotropic motility upon synapse formation.** (A) Representative Jurkat T cells in contact with non-activating (anti-CD28) or activating (anti-CD3/CD28) surfaces, with myosin-6 landing density and runs displayed as in Fig. 2. Rose plots show the distributions (PDFs) of mean headings on a cell-by-cell basis (B), and all run headings combined for all cells (C). Both measures show the inward myosin-6 motility converting to nearly isotropic motility on the activating surfaces. Nevertheless, all four distributions in (B, C) are nonuniform (Watson test of uniformity;  $U^2 = 1.9, 1.6, 27, 4.0$ ;  $p < 0.01$  for each). The heading distributions also differ within (B) and within (C) (Watson-Wheeler test of homogeneity;  $W = 35, 750$ ;  $p = 3 \times 10^{-8}, < 2 \times 10^{-16}$ ). Scale bars, 10  $\mu\text{m}$ .

124 and move nearly isotropically but with an outward bias in the distal zone. In contrast,  
125 myosin-6 moves out from the inner two zones and in from the outer zone. Thus, myosin-5  
126 motility diverges at the proximal / distal interface, while myosin-6 converges.

127 Based upon these headings over radial zones, we predict that myosin-5 concentrates  
128 in the cSMAC, while myosin-6 concentrates at the pSMAC / dSMAC boundary. We used  
129 immunofluorescence microscopy to determine if endogenous myosins localize in these  
130 predicted locations. Myosin-5 concentrates either in a narrow region within the cSMAC  
131 (Fig. 4C, D), or scatters throughout the cSMAC (Fig. 4E, F). The former, concentrated  
132 central pattern resembles the one observed by Bizario and coworkers [5]. Myosin-6 is  
133 more abundant, and covers the outermost pSMAC and dSMAC zones (Fig. 4G–J). These  
134 localization patterns suggest that both myosins are active and trafficking at the IS.

### 135 *The T cell state governs more than just the myosin heading*

136 The rerouting of myosin-5 and myosin-6 traffic is apparent by eye. In fact, we first  
137 noticed the rerouting of myosin traffic from inspecting the raw movies. However, other  
138 alterations in myosin motility at the IS might be more subtle and would require deeper  
139 analysis. Our tracking algorithms allow us to quantify other myosin motility features,  
140 including the landing rate, speed, persistence of movement, etc. (see Methods). As we  
141 show here, these features provide additional insight into how T cells control their actin  
142 networks at the synapse. Because we expect complex correlations between features, we  
143 use the UMAP dimension reduction algorithm to cluster cells by their myosin behavior.  
144 We then associate these clusters with the cellular state.

145 Our UMAP embedding for myosin-5 appears in Fig. 5A–C. As expected, the dominant  
146 feature is that cells cluster by heading in a circular pattern. Because the embedding  
147 orientation is arbitrary, we have rotated and reflected it to align with the color scheme in  
148 Fig. 5A. The anti-CD28 and anti-CD3/CD28 Jurkats cluster into two groups at opposite  
149 ends (Fig. 5B), flanking a central ring-like cluster (see below). The anti-CD28 cells cluster  
150 at the top (0°) while the anti-CD3/CD28 cells appear at the bottom (180°).

151 Because Jurkat T cells are an immortalized line with potential irregularities that might  
152 affect the construction of actin networks [1, 14], we also examined human PBMCs in our  
153 motility assay. The PBMCs on anti-CD3/CD28 surfaces and probed with myosin-5 (Fig.  
154 5C) appear near the corresponding Jurkats but offset to the upper-right. These cells show  
155 the same heading reversal as the Jurkat T cells, as seen in the green color of these points in  
156 Fig. 5A. However, other features differ somewhat (Supplementary Fig. S1, S2), allowing  
157 the PBMCs to form their own cluster here. Because Jurkat T cells have a CD4<sup>+</sup> origin,  
158 we also purified by negative selection CD8<sup>+</sup> PBMCs to understand a second major T cell  
159 class. These CD8<sup>+</sup> cells cluster within the Jurkat anti-CD3/CD28 cluster, suggesting they  
160 share similar motility features. Thus, the myosin traffic rerouting we see at the immune  
161 synapse appears to be a general phenomenon.

162 The UMAP embedding of cells probed with myosin-6 shows a similar circular feature,  
163 but with less distinct outer clusters (Fig. 5D–F). The Jurkat cells on anti-CD28 coverslips  
164 appear at the bottom of the cluster and are inward directed. However, the synapse-  
165 forming cells on anti-CD3/CD28 coverslips are distributed around the ring, as expected  
166 from the rose plots in Fig. 3B–C.

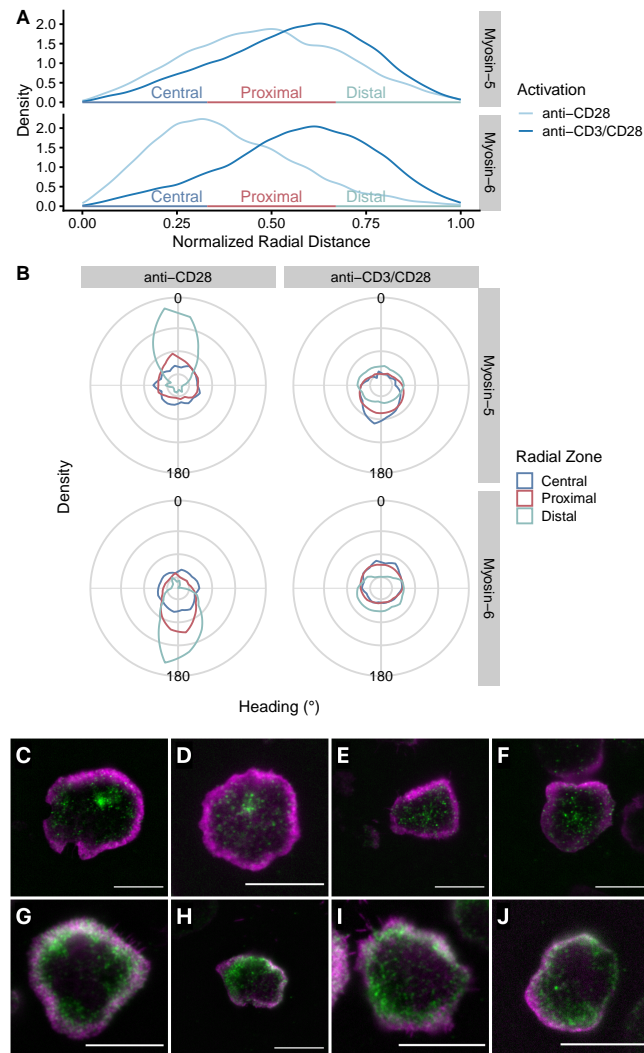

**Figure 4: Myosin motility depends upon the radial location within the T cell** (A) Distributions of radial distances from the cell center to the start of myosin runs. To allow comparisons between cells, we normalize distances relative to the maximum radial distance observed for each cell. On activating anti-CD3/CD28 surfaces, runs of both myosin-5 and myosin-6 shift outward. We divide the radial range into thirds, defining central, proximal, and distal zones that approximate the cSMAC, pSMAC, and dSMAC. (B) Heading changes depend upon the radial zone. On the non-activating anti-CD28 surfaces, both myosin-5 and myosin-6 show strong outward and inward preferences (respectively) in the distal zone. On activating anti-CD3/CD28 surfaces, myosin-5 moves nearly isotropically through the distal zone, but moves inward in the central and proximal zones. Likewise, myosin-6 moves outward from the central and proximal zones, and inward from the distal zone. This motility pattern would tend to focus myosin-6 at the proximal-distal boundary. The three zone distributions differ within each of the four conditions (Watson-Wheeler test of homogeneity;  $W = 600, 740, 550, 800$ ;  $p < 2 \times 10^{-16}$ ). Immunofluorescence images show that endogenous myosin-5 concentrates at the cSMAC in either a tight central cluster (C, D), or in a more scattered central pattern (E, F). Endogenous myosin-6 concentrates at the pSMAC/dSMAC (G-J). Magenta: actin, green: myosin, scale bars, 10  $\mu\text{m}$ .

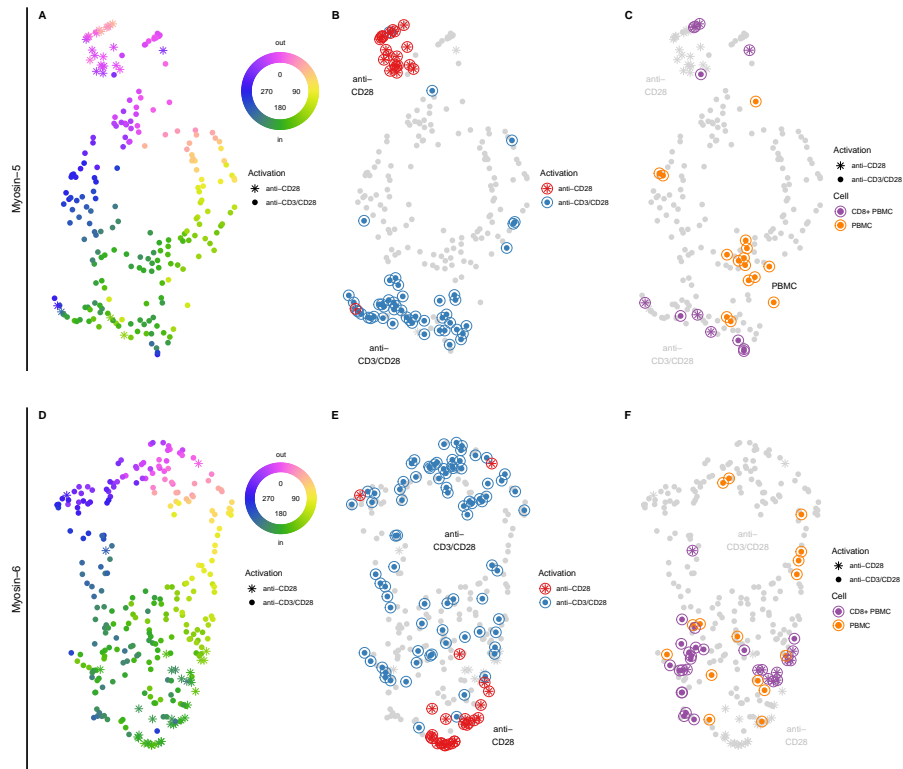

**Figure 5: Myosin motility reports the T cell state.** We applied UMAP dimension reduction to visualize clusters of myosin behavior, using feature vectors derived from all myosin run properties (see methods). We analyzed myosin-5 and myosin-6 treated cells as separate groups. (A) UMAP embedding of myosin-5 treated cells (including all cell lines, conditions, and treatments), colored by the median heading of the cell. The embedding has ring shaped central cluster with lobes extending out at 0° and 180°. Point shapes that mimic the shape of T cells indicate the surface conditions. (B) Highlighted points show Jurkat cells activated with anti-CD3/CD28 near 180°, or via CD28 alone near 0°. These groups form the two extended lobes. Text labels annotate the embedding regions, while the red/blue color indicates the actual coverslip condition for the individual cells. (C) Highlighted points show PBMCs and CD8<sup>+</sup> T cells clustering near their Jurkat counterparts. (D–F) The same as in (A–C), but for myosin-6. Note the loose cluster of anti-CD3/CD28-stimulated cells scattered around the central ring, reflecting the more isotropic motility of this myosin at the synapse.

167 *Actin network inhibitors reroute myosin traffic and affect the generation and display of T cell*  
168 *activation markers*

169 Rerouting at the IS shows that T cells exert control over their actin networks and  
170 myosin motors, directing myosins toward minor populations of filaments for their motil-  
171 ity. We wondered about the impact of disrupting these myosin traffic patterns on T cell  
172 function. To disrupt the actin networks we applied two compounds, CK666 and TR100.  
173 The small molecule CK666 inhibits Arp2/3 actin nucleation [30] and thus affects the  
174 lamellopodial actin at the dSMAC [29]. TR100 inhibits a specific tropomyosin splice iso-  
175 form, Tpm3.1 [40]. Because Tpm3.1 directs myosin-5 and nonmuscle myosin-2 activity  
176 [37, 3], we expected it to be an informative target.

177 Jurkat T cells treated with CK666 on anti-CD3/CD28 surfaces construct an atypical  
178 IS with many spikes at the distal edge. These synapses appear the same as those in prior  
179 work from the Hammer group [29]. They showed that treatment with CK666 causes  
180 the collapse of the lamellopodial actin, leaving behind formin-nucleated actin filament  
181 bundles (Fig. 6A). These long and linear bundles are enhanced by the increased pool of  
182 available G-actin [9]. Both myosin-5 and myosin-6 land and move unidirectionally along  
183 these bundles. Because they are formin nucleated, the actin bundles have a barbed end  
184 out orientation. Therefore, the myosin headings revert to their presynaptic, anti-CD28  
185 preferences (Fig. 6B, compare to Fig. 2–3).

186 When treated with TR100, the Jurkat synapses retain their round shape with a smooth  
187 outer boundary. However, a close examination of the actin reveals differences in its or-  
188 ganization. The TR100-treated cells often show a thin distal ring of dense actin, a broad  
189 and diffuse proximal zone, and a central hypodense region. Myosin-5 and myosin-6 both  
190 circulate at the outer edge of the synapse. Circulation is indicated by the desaturated  
191 colors of the outermost myosin runs in Fig. 6A. Circulation is also found in the ellipsoidal  
192 heading rose plots of Fig. 6B, with peaks at 90° and 270°.

193 When examining the runs separated into radial zones, both compounds strongly affect  
194 the headings in the distal zone (Fig. 6C). Although CK666 reroutes myosin-5 out at the  
195 distal and proximal IS, central IS traffic is still inward (Watson test of uniformity,  $U^2 =$   
196  $1.0$ ,  $p < 0.01$ ). Thus, unlike TR100, CK666 does not appear to affect the construction of  
197 actin networks at the cSMAC.

198 The myosin-5 UMAP embedding shows quite distinct clusters for the CK666- and  
199 TR100-treated cells (Fig. 6D). The CK666-treated cells appear in the top cluster along  
200 with the untreated anti-CD28 cells. The TR100 cells fill out the central ring-shaped clus-  
201 ter because they lack a single directional bias (clockwise and counterclockwise runs are  
202 balanced). The myosin-6 UMAP embedding shows similar features (Fig. 6E), except that  
203 the TR100 cells are distributed within the untreated anti-CD3/CD28 cell cluster because  
204 both sets lack a directional bias.

205 Given the strong effects of CK666 and TR100 on the immunological synapse, we ex-  
206 pected that these compounds might impair other aspects of downstream signaling in T  
207 cell activation. To uncover any impact on downstream events, we examined how these  
208 two compounds affect the display of activation markers on the T cell surface by flow cy-  
209 tometry. With or without CK666 inhibition, the anti-CD3/CD28 activated Jurkat T cells  
210 showed the same levels of CD69 and CD25 activation markers on the cell surface (Fig. 7  
211 and Supplementary Fig. S3). Therefore, even though dSMAC actin is prominent at the



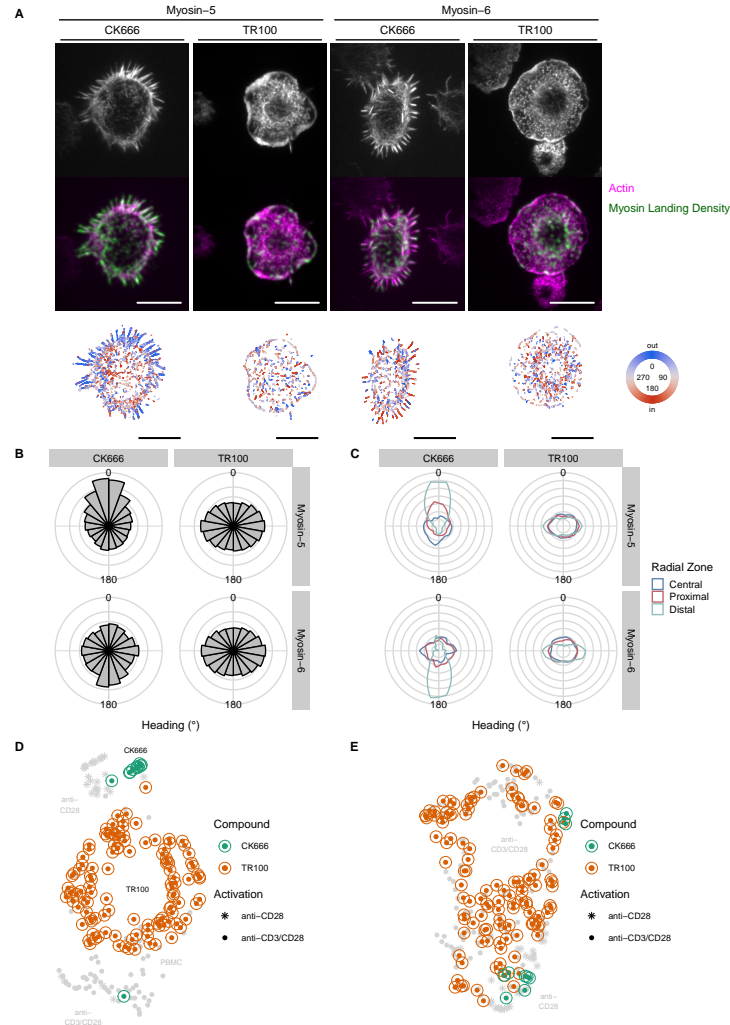

**Figure 6: Cytoskeletal inhibitors reroute myosin traffic in T cells on activating surfaces.** We treated Jurkat T cells with an Arp2/3 inhibitor (CK666) or a tropomyosin inhibitor (TR100) and applied them to anti-CD3/CD28 surfaces. (A) Fluorescence micrographs of actin, and an overlay with myosin landing intensity displayed as in Figs. 2-3. CK666 treated cells show peripheral spikes that resemble the microvilli of untreated Jurkats on anti-CD28 surfaces. TR100 cells have a similar round morphology to the untreated cells shown earlier, but with differences in the radial distribution of actin. The actin in these TR100-treated cells concentrates in a thin distal zone, with a more diffuse interior before fading in the hypodense central zone. The bottoms row shows myosin runs colored by heading. Scale bars, 10  $\mu$ m. (B) Heading rose plots, of all runs as in Figs. 2-3. CK666 treatment restores the outward myosin-5 traffic and the inward myosin-6 traffic. TR100 treatment causes both myosins to circulate clockwise and counterclockwise. All four distributions are nonuniform (Watson test of uniformity;  $U^2 = 36, 3.0, 2.0, 5.9$ ;  $p < 0.01$  for each). (C) Heading distributions of all runs by radial zone, as in Fig. 4. (D) Myosin-5 and (E) myosin-6 UMAP embeddings, as in Fig. 5 but colored to indicate the inhibitor treatment. CK666-treated cells tend to cluster with the nonactivated, anti-CD28 cells. TR100-treated cells form a large ring cluster that included cells that sample all possible headings (compare with Fig. 5A, D).



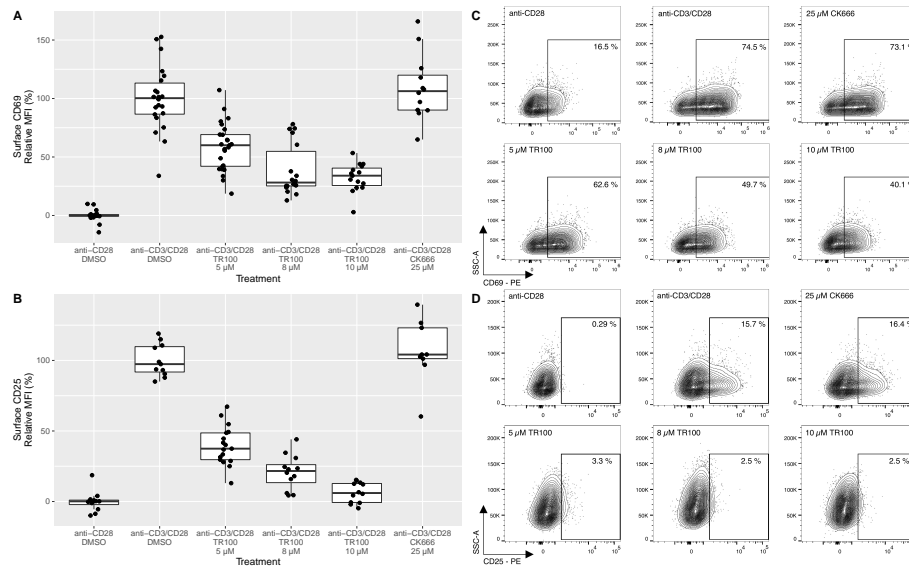

**Figure 7: Treatment with TR100 inhibits T cell activation marker display, while CK666 shows no such effect.** Flow cytometric analysis reveals a TR100 dose-dependent decrease of (A) surface CD69 ( $\chi^2(4) = 36.6$ ,  $p = 2.2 \times 10^{-7}$ ), and (B) surface CD25 ( $\chi^2(4) = 35.5$ ,  $p = 3.6 \times 10^{-7}$ ), in Jurkat T cells activated with anti-CD3/CD28. Treatment with CK666 does not alter any of these marker levels. Representative plots of (C) CD69 and (D) CD25 display changes after inhibitor treatment. Data points in (A, B) are from  $N = 3-6$  biological replicates with 2-3 technical replicates for each. The median fluorescence intensity (MFI) values are background-subtracted using the mean anti-CD28 values and normalized to the anti-CD3/CD28 control values for each biological replicate. We measured CD69 after 4 h and CD25 after 24 h.

212 IS, its specific disruption is relatively unimportant for downstream T cell activation pro-  
 213 cesses. In contrast, treatment with TR100 significantly reduces surface expression of both  
 214 CD69 and CD25. Even higher TR100 concentration and extended exposure is cytotoxic  
 215 to the T cells (Supplementary Figs. S4 & S5). To determine if this reduction in surface  
 216 markers is due to a trafficking defect, we examined the expression levels of the early ac-  
 217 tivation marker (CD69) in fixed and permeabilized cells. We see a similar reduction in  
 218 CD69 levels, suggesting that TR100 affects CD69 expression rather than later trafficking  
 219 events (Supplementary Fig. S6).

## 220 Discussion

221 In this work, we have tracked the motion of unconventional myosin motors over the  
 222 actin networks of the immunological synapse. By tracking these myosins, we construct a  
 223 functional map of the synapse. This map captures spatial information on the actin net-  
 224 work structure, filament polarity, density, and intrinsic myosin preferences for distinct  
 225 actin networks. The key finding is an aberrant myosin motility after synapse formation,  
 226 such that myosins move in the opposite direction than one would predict from the actin  
 227 polymerization patterns. Moreover, the T cell state tunes the motile properties of myosin

228 motors, which allows us to determine the T cell state solely from the information con-  
229 tained within the myosin trajectories. Specific disruptions of actin filament networks  
230 affect the display of T cell activation markers, establishing functional linkage between  
231 actin networks and T cell activity.

232 Our understanding of how processive myosin motors navigate the cell is still develop-  
233 ing. However, our field has proposed several molecular mechanisms for actin networks  
234 to regulate myosin traffic [36]. Actin filament age, applied forces (tension, compression,  
235 or torsion), posttranslational modifications, decoration with actin-binding proteins, and  
236 higher-order organization in crossings or bundles may all contribute to myosin regulation.  
237 Each of these actin network features modulate the interaction interface with myosin mo-  
238 tors, which could enhance or inhibit motility in a myosin class-specific manner. Although  
239 the IS can control myosin traffic in many ways, our results identify tropomyosins as a key  
240 regulator given the impact of TR100 inhibition. Tropomyosins can cooperatively deco-  
241 rate filaments, making them ideal to mark specialized, long actin filaments that direct  
242 myosin-5 toward the cSMAC. Tropomyosins regulate myosin-5 traffic in several known  
243 and characterized systems [22, 37, 3]. Our TR100 results also identify tropomyosins  
244 as a potential molecular target in immune systems. Because inhibition of tropomyosins  
245 suppresses CD69 and CD25 production, TR100 may have immunosuppressive activity in  
246 addition to its proposed anti-metastatic activity [15, 6, 40].

247 The *ex vivo* traffic maps reveal a surprising degree of myosin traffic at the cSMAC,  
248 given its low F-actin density. The cSMAC is often characterized as actin depleted, hypo-  
249 dense, or devoid of actin [18]. Indeed, one of the proposed roles for actin at the cSMAC  
250 is that it inhibits secretion of cytotoxic granules [33, 34, 12]. In this picture, actin at the  
251 cSMAC serves as a physical barrier that the T cell must clear for secretion. Our results  
252 assign an added role to cSMAC actin, to focus myosin-5 traffic toward the center of the  
253 cSMAC. Although it is tempting to speculate that myosin-5 transports TCR microclusters  
254 to the cSMAC, it seems clear that other mechanisms suffice. These include frictional cou-  
255 pling of TCRs to actin retrograde flow in the dSMAC and pSMAC, followed by handoff  
256 to dyneins in the final phase at the cSMAC [47]. Separate myosin-5 cargoes, including  
257 those coupled through various Rab family proteins [27, 45, 32], may instead play a role  
258 in T cell activation and IS development.

259 Our traffic maps also reveal that myosin-6 concentrates at the pSMAC, traveling in  
260 from the outside, out from the inside, and circulating in the middle. The pSMAC forms an  
261 adhesive ring with the target cell, typically through the combination of LFA-1 and ICAM1  
262 [29]. Although myosin-6 is not known to interact directly with LFA-1, it may have related  
263 roles that require localization at the pSMAC. These roles include endocytosis [11, 16, 39]  
264 or the anchoring of lipid membranes [21, 2]. Our imaging of endogenous myosins shows  
265 that myosin-6 is far more abundant than myosin-5 in T cells. This composition makes  
266 sense given that myosin-6 covers a larger area than the small central disk of myosin-5.  
267 The T cell may regulate expression levels of these two myosins to ensure coverage of their  
268 final target zones.

269 This work raises several important questions. Although it seems likely that the traf-  
270 ficking actin network is important for IS function given the impact of TR100 inhibition,  
271 the exact myosin cargoes are unknown. Such questions are best addressed through pro-  
272 teomics (BioID, APEX, and related methods). Moreover, given the challenges of embed-  
273 ding a trafficking actin network within a greater structural network, we need to determine

274 how the trafficking network assembles. Finally, we must assess the functional diversity  
275 of the trafficking actin network across T cell subsets and/or functional states. Are these  
276 specialized trafficking networks tuned to support effector mechanisms of T cells? Our  
277 data seem to support that idea, but a clearer picture will emerge from work on rarer T  
278 cell subpopulations.

279 Overall, this work has identified a new form of actin network specialization at the  
280 immunological synapse. Our results support a model of a network embedded within a  
281 network: a minor actin network for myosin trafficking, inside a larger and more promi-  
282 nent actin network to set the synaptic shape. These findings motivate future work to  
283 understand the structural dynamics and functional adaptations of the actin networks at  
284 the synapse.

## 285 **Acknowledgments**

286 We thank John Hammer for sharing unpublished data and for the tdTomato-F-Tractin  
287 construct, Anthony Kossiakoff and members of the Kossiakoff laboratory for assistance  
288 with flow cytometry, and Ainhoa Arina for helpful discussions and comments on the  
289 manuscript. We acknowledge the University of Chicago Research Computing Center and  
290 NIH Grant R01 GM124272 for support of this work.

## 291 **Materials and methods**

### 292 *Cells and reagents*

293 Jurkat cells (clone E6-1) were cultured in RPMI 1640 medium (Thermo Fisher Scien-  
294 tific) supplemented with 10% heat-inactivated FBS (Sigma). We obtained PBMCs derived  
295 from anonymous healthy human donors (ZenBio). The CD8<sup>+</sup> T cells were purified from  
296 PBMCs using negative selection bead binding (CD8<sup>+</sup> T Cell Isolation Kit, human, Miltenyi  
297 Biotec). The following compounds were used at the indicated concentrations: TR100 (5,  
298 8 or 10  $\mu$ M, Sigma Aldrich), CK666 (25  $\mu$ M, Fisher). Baculovirus containing myosin-5-  
299 YFP HMM and myosin-6-GFP HMM expression constructs were used to infect Sf9 cells  
300 and the motor proteins were purified using Flag-affinity chromatography as previously  
301 described [8, 35].

### 302 *Ex vivo motility*

303 Plasma-cleaned glass coverslips were coated with 0.01% poly-L-lysine (Sigma) for 30  
304 min, RT, followed by coating with antibodies: anti-human CD3 (clone OKT3, 10  $\mu$ g/mL,  
305 Invitrogen) and anti-human CD28 (clone CD28.2, 10  $\mu$ g/mL, BD Pharmingen) for 1 h at  
306 37 °C. Cells were seeded onto prepared coverslips and activated for 5 min at 37 °C. During  
307 the inhibitor assays, cells were pre-treated with 1% DMSO as vehicle control or selected  
308 inhibitors for 15 min at 37 °C before activation.

309 Cells were then washed with PEM buffer (0.1 M PIPES, 5 mM EGTA, 2 mM MgCl<sub>2</sub>·6  
310 H<sub>2</sub>O, pH 6.8) containing 3.3% (v/v) polyethylene glycol 8000, 0.083% Triton X-100, 0.83  
311  $\mu$ g/mL phalloidin-tetramethylrhodamine B isothiocyanate (Sigma), 2.67% paraformalde-  
312 hyde, and immediately washed with PBS. Imaging chambers were then assembled using  
313 glass coverslips with cells and microscope slides with double stick tape. Imaging chambers

314 were filled with motility buffer (25 mM imidazole-HCl, 1 mM K-EGTA, 4 mM MgCl<sub>2</sub>, 25  
315 mM KCl, pH 7.5) containing recombinant myosins, BSA (1 mg/mL, Calbiochem), 1% Tri-  
316 ton X-100, 2 mM ATP, and an oxygen scavenging system composed of 216 µg/mL glucose  
317 oxidase (Calbiochem), 36 µg/mL catalase (Sigma), and 4.5 mg/mL glucose.

#### 318 *Single-molecule imaging using TIRF microscopy*

319 We used a custom-built objective-type total internal reflection fluorescent microscope  
320 for single-molecule myosin tracking. The microscope is equipped with a 100x, 1.40  
321 NA objective (Olympus SuperApo) and an EMCCD camera (iXon, Andor Technologies).  
322 Movies were collected at 2 Hz. A single frame of tetramethylrhodamine-phalloidin (TMR-  
323 phalloidin) stained actin was visualized first, followed by an image stack of the FP to  
324 observe myosin movements. Images were collected at 23 °C.

#### 325 *Myosin tracking*

326 Movies of single-molecule myosin movements were tracked using the TrackMate pack-  
327 age in FIJI [13], using previously described procedures and settings [8]. We exported an  
328 XML file for each movie that contained the myosin tracks identified by TrackMate. This file  
329 was then processed with a python script that calculated a set of motility metrics for each  
330 myosin trajectory, as defined here. Persistence is the end-to-end distance divided by the  
331 runlength. The persistence is a unitless quantity that approaches one for straight paths,  
332 and falls to zero for bent paths or paths with back-and-forth behavior. Heading is the  
333 angle between the vector from the start to the end of the path, relative to the vector from  
334 the center of the cell to the start of the run. Heading values were unwrapped to fall within  
335 the range of 0–360°. Paths that point away from the center of the cell have a heading of  
336 0°, while paths that point toward the cell center have a heading of 180°. The normalized  
337 start radius is the distance from the start of the trajectory to the cell center, divided by  
338 the maximal distance for each cell. We collected these path metrics for all tracking exper-  
339 iments, along with factors identifying the experimental conditions. Summary statistics  
340 for paths were generated in R and plotted using the package *ggplot2*. Landing intensity  
341 images in Figs. 2 and 3 were produced using the *spatstat* package (version 2.2) in R.

#### 342 *UMAP dimension reduction*

343 For each recorded cell, we constructed feature vectors from the five quantiles (10%,  
344 25%, 50%, 75%, and 90%) of the following myosin trajectory metrics: velocity, persis-  
345 tence, normalized start radius, and the x- and y-components of the heading vectors. We  
346 also included the landing rate and the circular mean resultant length ( $\rho$ ) as single val-  
347 ues for each cell. The mean resultant length is a quantity that expresses the tendency of a  
348 collection of heading vectors from a single cell to point in the same direction. All heading  
349 vectors are mapped onto the unit circle, and the arithmetic mean of all points is taken.  
350 This mean value will lie within the unit disc, and its radius is assigned to  $\rho$ .  $\rho$  is 0  
351 for headings that are uniformly distributed around the unit circle, and is 1 if all headings  
352 point in the same direction. Using this collection of features in our feature vector, we  
353 then applied the UMAP algorithm as implemented in the *UMAPjl* package (version 0.1.6)  
354 in Julia [4]. The input parameters for UMAP were 50 neighbors, a minimum distance of  
355 0.015, and 50,000 epochs.

356 *Immunocytochemistry*

357 Jurkat cells were activated following the same protocol as described for *ex vivo* motility. In the next step cells were fixed with 4% paraformaldehyde for 15 min at RT. Cells  
358 were then washed with PBS, permeabilized using 0.1% Triton X-100, 3 min at RT, washed  
359 with PBS and incubated with blocking buffer (3% BSA in PBS) for 30 min at RT to decrease nonspecific antibody binding. Cells were then incubated overnight at 4 °C with  
360 primary antibodies diluted in blocking buffer: anti-myosin-5a antibody (1:100, #3402, Cell Signaling Technology), or anti-myosin-6 antibody (1:200, ABT42, Millipore). Cells  
361 were washed with PBS, and incubated for 1 h at RT with Cy5-conjugated goat anti-rabbit  
362 antibody (1:250, #A10523, Thermo Fisher Scientific) diluted in blocking buffer. After  
363 incubation cells were incubated for 5 min at RT with TMR-phalloidin (0.83 µg/mL) and  
364 Hoechst 33342 (1 µg/mL, Invitrogen) in PBS and washed with blocking buffer before  
365 imaging on a Zeiss Axiovert 200 equipped with an Andor Luca camera.  
366  
367  
368

369 *Flow cytometry*

370 Cells treated or untreated with chosen inhibitors were activated at 37 °C for 4 h or 24  
371 h on 96-well plates coated with 0.01% poly-L-lysine and CD28 (10 µg/mL) or CD3/CD28  
372 (10 µg/mL each) antibodies. After activation, cells were stained with antibodies: CD69-  
373 PE (clone FN50, Biolegend) and CD25-PE (clone BC96, Biolegend). Selection of live  
374 cells was accomplished by staining with either propidium iodide or Fixable Viability Dye  
375 eFluor 520 (eBioscience).

376 Cells were analyzed using a CytoFLEX V0-B2-R2 flow cytometer (Beckman Coulter  
377 Life Sciences). Data were analyzed using FlowJo Software (v10.0.7). The obtained median  
378 fluorescence intensity (MFI) values were normalized for each separate experiment  
379 by transforming the mean MFI of non-activated (CD28 only) cells to 0%, and mean MFI  
380 of activated control cells (anti-CD3/CD28 + DMSO) to 100%.

381 *Data exclusions*

382 We excluded 10 cells after inspection of their heading distributions, 7 probed with  
383 myosin-5 and 3 probed with myosin-6. All were Jurkat T cells under activating anti-  
384 CD3/CD28 conditions and no cytoskeletal inhibitors. The excluded cells had the characteristic  
385 spiky appearance of the unactivated Jurkats shown at the top of Fig. 2A. These  
386 cells also showed a preference for outward myosin-5 / inward myosin-6 movements, in  
387 contrast with the remainder of the dataset. We suspect that these cells landed on cover-  
388 slips with defective or incomplete antibody coating.

389 *Statistical analysis*

390 All significance tests for nonuniform heading distributions were determined using the  
391 Watson test of uniformity. Comparisons between heading distributions were determined  
392 with the nonparametric Watson-Wheeler test. Both use the implementation found in the  
393 R package *circular* (version 0.4-93). For Fig. 7, we used linear mixed effects regression  
394 to model the effect of treatment on the CD69 and CD25 cell-surface markers. We used  
395 treatment (the three concentrations of TR100 plus the single CK666) as the fixed effect,  
396 and the interaction of biological replicate and treatment as random effect intercepts. We  
397 used a likelihood ratio test to obtain p-values, comparing to a null model that omits the

398 treatment fixed effect. These linear mixed effects analyses were performed with the R  
399 package *lme4* (version 1.1-27.1). For all experiments,  $\alpha = 0.05$  was used as the threshold  
400 for statistical significance.

401 **Supplementary Information**

Table S1: Summary of experimental conditions, number of cells acquired, and number of myosin runs acquired.

| Motor    | Activator     | Compound  | Cell                  | N.cells | N.runs |
|----------|---------------|-----------|-----------------------|---------|--------|
| Myosin-5 | anti-CD28     | Untreated | CD8 <sup>+</sup> PBMC | 7       | 776    |
| Myosin-5 | anti-CD28     | Untreated | Jurkat                | 21      | 14709  |
| Myosin-5 | anti-CD3/CD28 | CK666     | Jurkat                | 11      | 23758  |
| Myosin-5 | anti-CD3/CD28 | Untreated | CD8 <sup>+</sup> PBMC | 5       | 1143   |
| Myosin-5 | anti-CD3/CD28 | Untreated | Jurkat                | 49      | 65510  |
| Myosin-5 | anti-CD3/CD28 | Untreated | PBMC                  | 15      | 11284  |
| Myosin-5 | anti-CD3/CD28 | TR100     | Jurkat                | 114     | 44454  |
| Myosin-6 | anti-CD28     | Untreated | CD8 <sup>+</sup> PBMC | 11      | 3068   |
| Myosin-6 | anti-CD28     | Untreated | Jurkat                | 26      | 23840  |
| Myosin-6 | anti-CD3/CD28 | CK666     | Jurkat                | 10      | 9967   |
| Myosin-6 | anti-CD3/CD28 | Untreated | CD8 <sup>+</sup> PBMC | 18      | 7826   |
| Myosin-6 | anti-CD3/CD28 | Untreated | Jurkat                | 87      | 71844  |
| Myosin-6 | anti-CD3/CD28 | Untreated | PBMC                  | 16      | 5675   |
| Myosin-6 | anti-CD3/CD28 | TR100     | Jurkat                | 121     | 55312  |



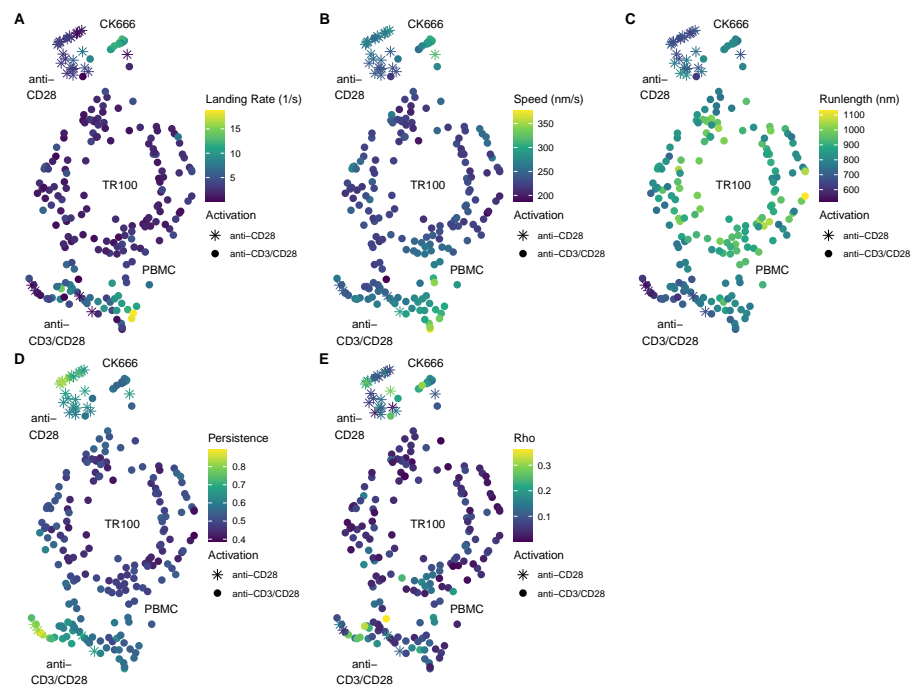

Figure S1: **Myosin-5 UMAP embedding features.** The points are colored by mean feature values used in constructing the UMAP embedding (aside from the heading, which is shown in 5).

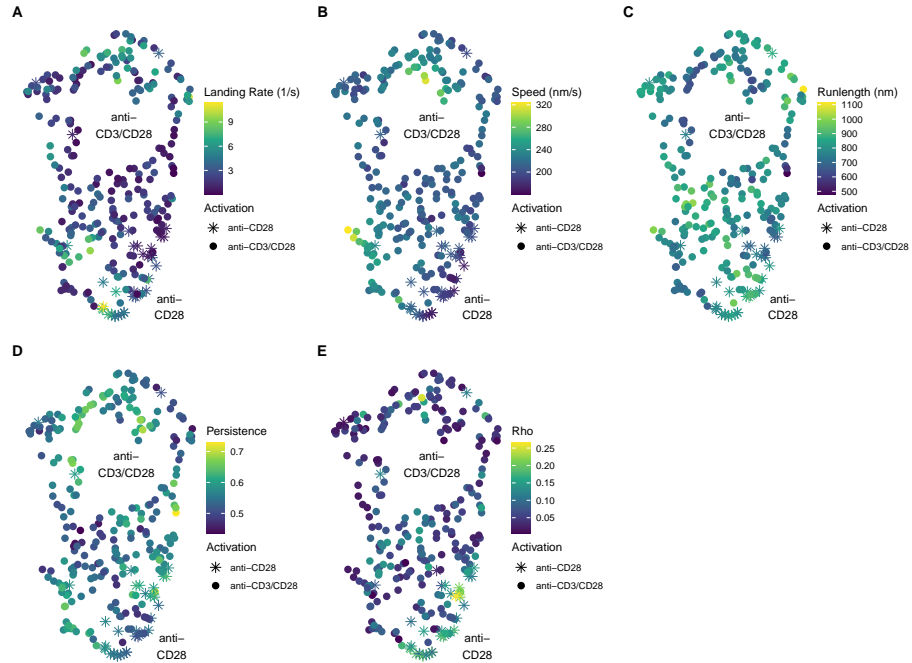

Figure S2: **Myosin-6 UMAP embedding features.** The points are colored by mean feature values used in constructing the UMAP embedding (aside from the heading, which is shown in 5).

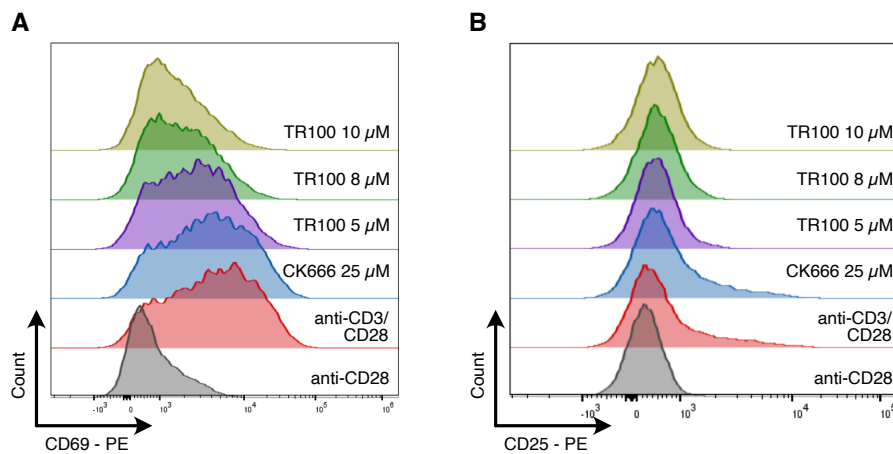

Figure S3: **CD69 and CD25 display is inhibited by TR100.** Representative distributions of CD69 (A) and CD25 (B) signals measured by flow cytometry. CD69 was measured after 4 h, and CD25 was measured after 24 h.

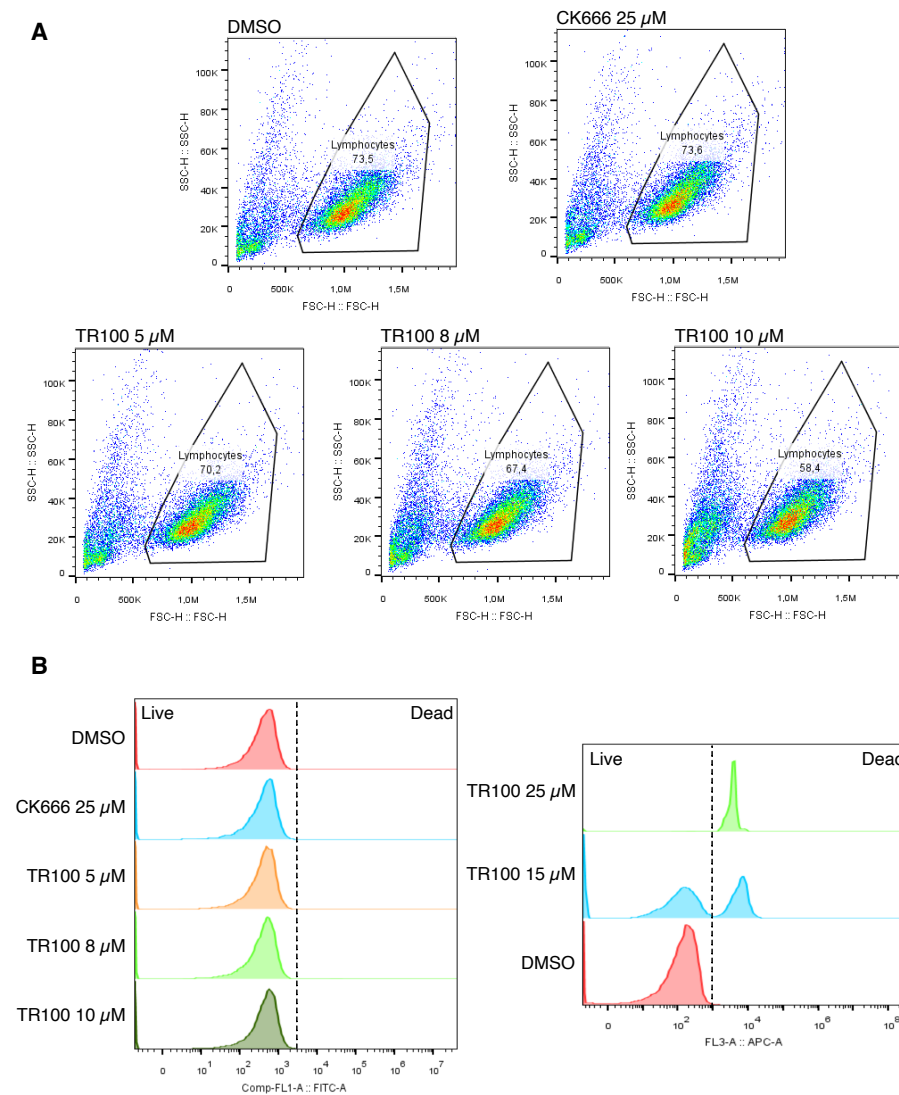

Figure S4: **TR100 and CK666 cytotoxicity after 4 h.** (A) Representative side scatter / forward scatter (SSC-H/FSC-H) plots for cell inhibitor treatments after 4h (Fig. 7A). (B) Cell viability for inhibitor treatments. Higher concentrations of TR100 (15  $\mu$ M and 25  $\mu$ M) result in significant cytotoxicity after 4 h, and were not used in Fig. 7A,C.

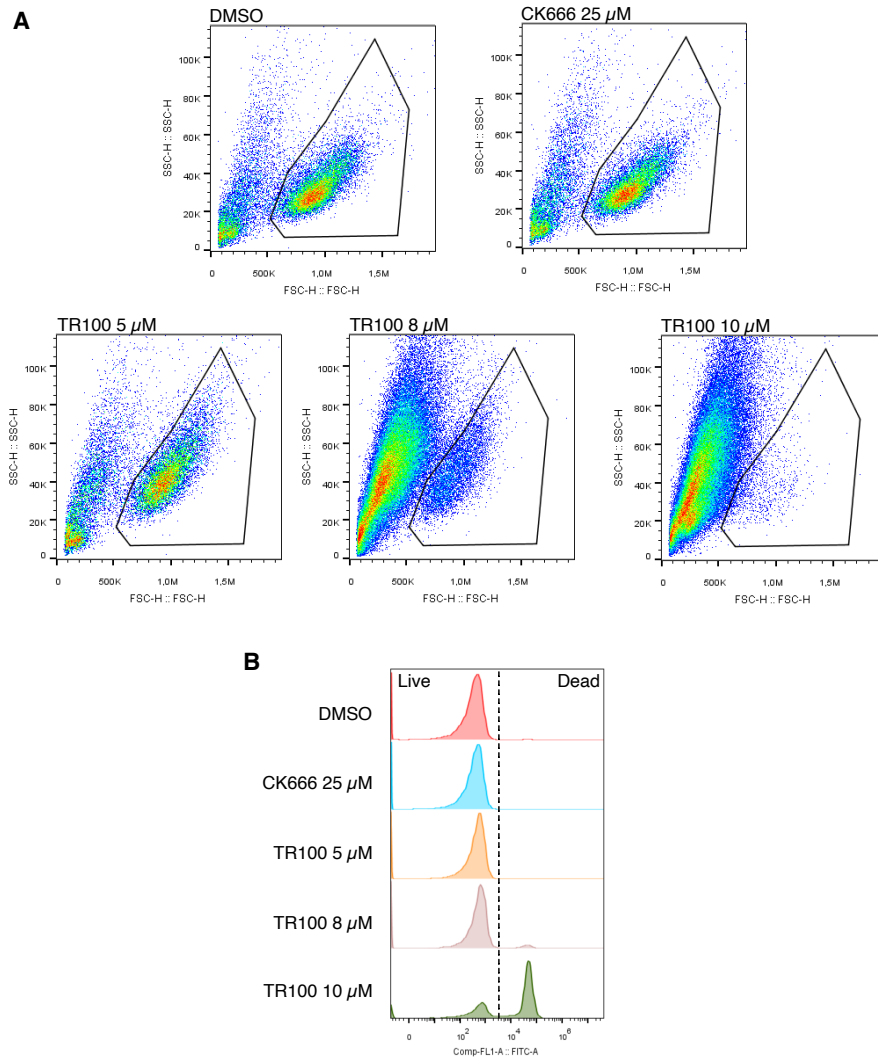

Figure S5: **TR100 and CK666 cytotoxicity after 24 h.** (A) Representative SSC-H/FSC-H plots for cell inhibitor treatments after 24h (Fig. 7B). (B) Cell viability for inhibitor treatments. The highest concentration of TR100 used here (10  $\mu$ M) was cytotoxic after 24 h. The remaining viable cells at this TR100 concentration were analyzed in Fig. 7B for CD25. Note that lower TR100 concentrations (5  $\mu$ M and 8  $\mu$ M) had sufficient numbers of viable cells for analysis.

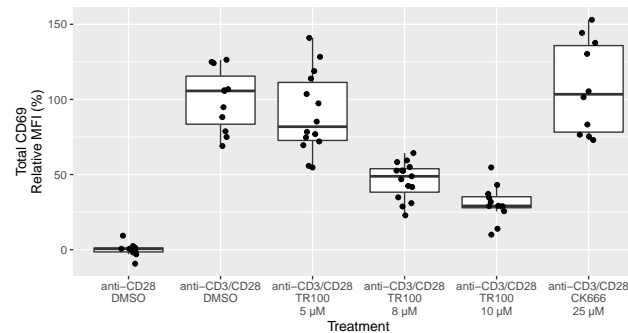

Figure S6: **Treatment with TR100 inhibits production of the early T cell activation marker CD69, while CK666 shows no such effect.** Flow cytometric analysis of permeabilized cells reveals a TR100 dose-dependent decrease of total CD69 ( $\chi^2(4) = 53.7$ ,  $p = 6.1 \times 10^{-11}$ ), in Jurkat cells activated with anti-CD3/CD28. Treatment with CK666 does not alter CD69 levels. Data points are from  $N = 3-6$  biological replicates with 2-3 technical replicates for each. The median fluorescence intensity (MFI) values are background-subtracted using the mean anti-CD28 values and normalized to the anti-CD3/CD28 control values for each biological replicate. We measured CD69 after 4 h.

402 *Video S1*

403 Myosin-5 runs along a Jurkat T cell on an anti-CD28 coverslip. TMR-phalloidin stain-  
404 ing of actin in red, myosin in green. The movie shows a  $30 \times 30 \mu\text{m}$  area. The movie  
405 was recorded at 2 Hz, while playback is at 20 Hz (10x speedup).

406 *Video S2*

407 Myosin-5 runs along a Jurkat T cell on an anti-CD3/CD28 coverslip. TMR-phalloidin  
408 staining of actin in red, myosin in green. The movie shows a  $30 \times 30 \mu\text{m}$  area. The movie  
409 was recorded at 2 Hz, while playback is at 20 Hz (10x speedup).

410 *Video S3*

411 A Jurkat T cell transfected with tdTomato-F-Tractin, with the video beginning soon  
412 after contact with an anti-CD3/CD28 coverslip. Retrograde flow of actin is apparent at  
413 the dSMAC once the synapse has maximally expanded. Framerate is 2x live. Scale bar, 5  
414  $\mu\text{m}$ .

415 *Video S4*

416 Myosin-6 runs along a Jurkat T cell on an anti-CD28 coverslip. TMR-phalloidin stain-  
417 ing of actin in red, myosin in green. The movie shows a  $30 \times 30 \mu\text{m}$  area. The movie  
418 was recorded at 2 Hz, while playback is at 20 Hz (10x speedup).

419 *Video S5*

420 Myosin-6 runs along a Jurkat T cell on an anti-CD3/CD28 coverslip. TMR-phalloidin  
421 staining of actin in red, myosin in green. The movie shows a  $30 \times 30 \mu\text{m}$  area. The movie  
422 was recorded at 2 Hz, while playback is at 20 Hz (10x speedup).

423 **References**

- 424 [1] Robert T Abraham and Arthur Weiss. Jurkat T cells and development of the T-  
425 cell receptor signalling paradigm. *Nat Rev Immunol*, 4(4):301–8, Apr 2004. doi:  
426 10.1038/nri1330.
- 427 [2] David Altman, H Lee Sweeney, and James A Spudich. The mechanism of myosin vi  
428 translocation and its load-induced anchoring. *Cell*, 116(5):737–49, Mar 2004.
- 429 [3] Bipasha Barua, Maria Sckolnick, Howard D White, Kathleen M Trybus, and Sarah E  
430 Hitchcock-DeGregori. Distinct sites in tropomyosin specify shared and isoform-  
431 specific regulation of myosins II and V. *Cytoskeleton (Hoboken)*, 75(4):150–163,  
432 04 2018. doi: 10.1002/cm.21440.
- 433 [4] Jeff Bezanson, Alan Edelman, Stefan Karpinski, and Viral B. Shah. Julia: A fresh  
434 approach to numerical computing. *SIAM Review*, 59(1):65–98, 2017. doi: 10.1137/  
435 141000671. URL <http://dx.doi.org/10.1137/141000671>.
- 436 [5] João C S Bizario, Fabíola A Castro, Josane F Sousa, Rafael N Fernandes, Alexandre D  
437 Damião, Márika K Oliveira, Patrícia V B Palma, Roy E Larson, Júlio C Voltarelli, and  
438 Enilza M Espreafico. Myosin-V colocalizes with MHC class II in blood mononuclear  
439 cells and is up-regulated by T-lymphocyte activation. *J Leukoc Biol*, 71(2):195–204,  
440 Feb 2002.
- 441 [6] Teresa T Bonello, Miro Janco, Jeff Hook, Alex Byun, Mark Appaduray, Irina Dedova,  
442 Sarah Hitchcock-DeGregori, Edna C Hardeman, Justine R Stehn, Till Böcking, and  
443 Peter W Gunning. A small molecule inhibitor of tropomyosin dissociates actin bind-  
444 ing from tropomyosin-directed regulation of actin dynamics. *Sci Rep*, 6:19816, Jan  
445 2016. doi: 10.1038/srep19816.
- 446 [7] Crista M Brawley and Ronald S Rock. Unconventional myosin traffic in cells reveals  
447 a selective actin cytoskeleton. *Proc Natl Acad Sci U S A*, 106(24):9685–9690, Jun  
448 2009.
- 449 [8] Darren S Bryan, Melinda Stack, Katarzyna Krysztofiak, Urszula Cichoń, Dustin G  
450 Thomas, Alexandra Surcel, Eric S Schiffhauer, Michael A Beckett, Nikolai N Kho-  
451 darev, Lai Xue, Elizabeth C Poli, Alexander T Pearson, Mitchell C Posner, Douglas N  
452 Robinson, Ronald S Rock, and Ralph R Weichselbaum. 4-Hydroxyacetophenone  
453 modulates the actomyosin cytoskeleton to reduce metastasis. *Proc Natl Acad Sci U  
454 S A*, 117(36):22423–22429, Sep 2020. doi: 10.1073/pnas.2014639117.
- 455 [9] Thomas A Burke, Jenna R Christensen, Elisabeth Barone, Cristian Suarez, Vladimir  
456 Sirotkin, and David R Kovar. Homeostatic actin cytoskeleton networks are regulated  
457 by assembly factor competition for monomers. *Curr Biol*, 24(5):579–85, Mar 2014.
- 458 [10] Janis K Burkhardt, Esteban Carrizosa, and Meredith H Shaffer. The actin cytoskele-  
459 ton in T cell activation. *Annu Rev Immunol*, 26:233–59, 2008.

- 460 [11] F Buss, S D Arden, M Lindsay, J P Luzio, and J Kendrick-Jones. Myosin vi isoform  
461 localized to clathrin-coated vesicles with a role in clathrin-mediated endocytosis.  
462 *EMBO J*, 20(14):3676–84, Jul 2001.
- 463 [12] Alexandre F Carisey, Emily M Mace, Mezida B Saeed, Daniel M Davis, and Jordan S  
464 Orange. Nanoscale dynamism of actin enables secretory function in cytolytic cells.  
465 *Curr Biol*, 28(4):489–502.e9, 02 2018. doi: 10.1016/j.cub.2017.12.044.
- 466 [13] Nicolas Chenouard, Ihor Smal, Fabrice de Chaumont, Martin Maška, Ivo F  
467 Sbalzarini, Yuanhao Gong, Janick Cardinale, Craig Carthel, Stefano Coraluppi, Mark  
468 Winter, Andrew R Cohen, William J Godinez, Karl Rohr, Yannis Kalaidzidis, Liang  
469 Liang, James Duncan, Hongying Shen, Yingke Xu, Klas E G Magnusson, Joakim  
470 Jaldén, Helen M Blau, Perrine Paul-Gilloteaux, Philippe Roudot, Charles Kervrann,  
471 François Waharte, Jean-Yves Tinevez, Spencer L Shorte, Joost Willemse, Katherine  
472 Celler, Gilles P van Wezel, Han-Wei Dan, Yuh-Show Tsai, Carlos Ortiz de Solórzano,  
473 Jean-Christophe Olivo-Marin, and Erik Meijering. Objective comparison of particle  
474 tracking methods. *Nat Methods*, 11(3):281–9, Mar 2014.
- 475 [14] Huw Colin-York, Sudha Kumari, Liliana Barbieri, Lena Cords, and Marco Fritzsche.  
476 Distinct actin cytoskeleton behaviour in primary and immortalised t-cells. *J Cell Sci*,  
477 133(5), 09 2019. doi: 10.1242/jcs.232322.
- 478 [15] Mark A Currier, Justine R Stehn, Ashleigh Swain, Duo Chen, Jeff Hook, Eleanor  
479 Eiffe, Andrew Heaton, David Brown, Brooke A Nartker, David W Eaves, Nina Kloss,  
480 Herbert Treutlein, Jun Zeng, Irina B Alieva, Vera B Dugina, Edna C Hardeman, Pe-  
481 ter W Gunning, and Timothy P Cripe. Identification of cancer-targeted tropomyosin  
482 inhibitors and their synergy with microtubule drugs. *Mol Cancer Ther*, 16(8):1555–  
483 1565, 08 2017. doi: 10.1158/1535-7163.MCT-16-0873.
- 484 [16] Amber L Dance, Matthew Miller, Shinobu Seragaki, Prafulla Aryal, Breanne White,  
485 Laura Aschenbrenner, and Tama Hasson. Regulation of myosin-vi targeting to en-  
486 docytic compartments. *Traffic*, 5(10):798–813, Oct 2004.
- 487 [17] Michael L Dustin and Kaushik Choudhuri. Signaling and polarized communication  
488 across the T cell immunological synapse. *Annu Rev Cell Dev Biol*, 32:303–325, 10  
489 2016. doi: 10.1146/annurev-cellbio-100814-125330.
- 490 [18] John A Hammer, Jia C Wang, Mezida Saeed, and Antonio T Pedrosa. Origin,  
491 organization, dynamics, and function of actin and actomyosin networks at the  
492 T cell immunological synapse. *Annu Rev Immunol*, 37:201–224, 04 2019. doi:  
493 10.1146/annurev-immunol-042718-041341.
- 494 [19] John A Hammer, 3rd and Janis K Burkhardt. Controversy and consensus regarding  
495 myosin ii function at the immunological synapse. *Curr Opin Immunol*, 25(3):300–6,  
496 Jun 2013.
- 497 [20] Rizal F Hariadi, Mario Cale, and Sivaraj Sivaramakrishnan. Myosin lever arm directs  
498 collective motion on cellular actin network. *Proc Natl Acad Sci U S A*, 111(11):4091–  
499 6, Mar 2014. doi: 10.1073/pnas.1315923111.



- 500 [21] T Hasson, P G Gillespie, J A Garcia, R B MacDonald, Y Zhao, A G Yee, M S Mooseker,  
501 and D P Corey. Unconventional myosins in inner-ear sensory epithelia. *J Cell Biol*,  
502 137(6):1287–307, Jun 1997.
- 503 [22] Alex R Hodges, Elena B Kremontsova, Carol S Bookwalter, Patricia M Fagnant,  
504 Thomas E Sladewski, and Kathleen M Trybus. Tropomyosin is essential for proces-  
505 sive movement of a class V myosin from budding yeast. *Curr Biol*, 22(15):1410–6,  
506 Aug 2012.
- 507 [23] Johannes B Huppa and Mark M Davis. The interdisciplinary science of T-cell recogni-  
508 tion. *Adv Immunol*, 119:1–50, 2013. doi: 10.1016/B978-0-12-407707-2.00001-1.
- 509 [24] Yoshihisa Kaizuka, Adam D Douglass, Rajat Varma, Michael L Dustin, and Ronald D  
510 Vale. Mechanisms for segregating T cell receptor and adhesion molecules during  
511 immunological synapse formation in jurkat t cells. *Proc Natl Acad Sci U S A*, 104  
512 (51):20296–301, Dec 2007. doi: 10.1073/pnas.0710258105.
- 513 [25] Sudha Kumari, Santosha Vardhana, Michael Cammer, Silvia Curado, Luis Santos,  
514 Michael P Sheetz, and Michael L Dustin. T lymphocyte myosin iia is required for  
515 maturation of the immunological synapse. *Front Immunol*, 3:230, 2012. doi: 10.  
516 3389/fimmu.2012.00230.
- 517 [26] Audrey Le Floch and Morgan Huse. Molecular mechanisms and functional impli-  
518 cations of polarized actin remodeling at the T cell immunological synapse. *Cell Mol*  
519 *Life Sci*, 72(3):537–556, Feb 2015. doi: 10.1007/s00018-014-1760-7.
- 520 [27] Qing Lu, Jianchao Li, and Mingjie Zhang. Cargo recognition and cargo-mediated  
521 regulation of unconventional myosins. *Acc Chem Res*, 47(10):3061–70, Oct 2014.
- 522 [28] Kaspar D Mossman, Gabriele Campi, Jay T Groves, and Michael L Dustin. Altered  
523 tcr signaling from geometrically repatterned immunological synapses. *Science*, 310  
524 (5751):1191–3, Nov 2005. doi: 10.1126/science.1119238.
- 525 [29] Sricharan Murugesan, Jinsung Hong, Jason Yi, Dong Li, Jordan R Beach, Lin  
526 Shao, John Meinhardt, Grey Madison, Xufeng Wu, Eric Betzig, and John A Ham-  
527 mer. Formin-generated actomyosin arcs propel T cell receptor microcluster move-  
528 ment at the immune synapse. *J Cell Biol*, 215(3):383–399, Nov 2016. doi:  
529 10.1083/jcb.201603080.
- 530 [30] B J Nolen, N Tomasevic, A Russell, D W Pierce, Z Jia, C D McCormick, J Hartman,  
531 R Sakowicz, and T D Pollard. Characterization of two classes of small molecule  
532 inhibitors of arp2/3 complex. *Nature*, 460(7258):1031–4, Aug 2009. doi: 10.  
533 1038/nature08231.
- 534 [31] M A Norcross. A synaptic basis for T-lymphocyte activation. *Ann Immunol (Paris)*,  
535 135D(2):113–34, 1984. doi: 10.1016/s0769-2625(84)81105-8.
- 536 [32] Angela Oberhofer, Peter Spieler, Yuliya Rosenfeld, Willi L Stepp, Augustine Cleetus,  
537 Alistair N Hume, Felix Mueller-Planitz, and Zeynep Ökten. Myosin va’s adaptor  
538 protein melanophilin enforces track selection on the microtubule and actin networks

- 539 in vitro. *Proc Natl Acad Sci U S A*, 114(24):E4714–E4723, 06 2017. doi: 10.1073/  
540 pnas.1619473114.
- 541 [33] Alex T Ritter, Yukako Asano, Jane C Stinchcombe, N M G Dieckmann, Bi-Chang  
542 Chen, C Gawden-Bone, Schuyler van Engelenburg, Wesley Legant, Liang Gao,  
543 Michael W Davidson, Eric Betzig, Jennifer Lippincott-Schwartz, and Gillian M Grif-  
544 fiths. Actin depletion initiates events leading to granule secretion at the immuno-  
545 logical synapse. *Immunity*, 42(5):864–76, May 2015. doi: 10.1016/j.immuni.2015.  
546 04.013.
- 547 [34] Alex T Ritter, Senta M Kapnick, Sricharan Murugesan, Pamela L Schwartzberg,  
548 Gillian M Griffiths, and Jennifer Lippincott-Schwartz. Cortical actin recovery at  
549 the immunological synapse leads to termination of lytic granule secretion in cyto-  
550 toxic t lymphocytes. *Proc Natl Acad Sci U S A*, 114(32):E6585–E6594, 08 2017. doi:  
551 10.1073/pnas.1710751114.
- 552 [35] Ronald S Rock, Sarah E Rice, Amber L Wells, Thomas J Purcell, James A Spudich,  
553 and H Lee Sweeney. Myosin VI is a processive motor with a large step size. *Proc*  
554 *Natl Acad Sci USA*, 98(24):13655–9, Nov 2001.
- 555 [36] Alicja Santos, Yauhen Shauchuk, Urszula Cichoń, Kevin C Vavra, and Ronald S Rock.  
556 How actin tracks affect myosin motors. *Adv Exp Med Biol*, 1239:183–197, 2020. doi:  
557 10.1007/978-3-030-38062-5\_9.
- 558 [37] Maria Skolnick, Elena B Kremntsova, David M Warshaw, and Kathleen M Trybus.  
559 Tropomyosin isoforms bias actin track selection by vertebrate myosin Va. *Mol Biol*  
560 *Cell*, 27(19):2889–97, 10 2016. doi: 10.1091/mbc.E15-09-0641.
- 561 [38] M. P. Sheetz and J. A. Spudich. Movement of myosin-coated fluorescent beads on  
562 actin cables in vitro. *Nature*, 303(5912):31–5., 1983.
- 563 [39] Giulietta Spudich, Margarita V Chibalina, Josephine Sui-Yan Au, Susan D Arden,  
564 Folma Buss, and John Kendrick-Jones. Myosin vi targeting to clathrin-coated struc-  
565 tures and dimerization is mediated by binding to disabled-2 and ptdins(4,5)p2. *Nat*  
566 *Cell Biol*, 9(2):176–83, Feb 2007.
- 567 [40] Justine R Stehn, Nikolas K Haass, Teresa Bonello, Melissa Desouza, Gregg Kottyan,  
568 Herbert Treutlein, Jun Zeng, Paula R B B Nascimento, Vanessa B Sequeira, Tanya L  
569 Butler, Munif Allanson, Thomas Fath, Timothy A Hill, Adam McCluskey, Galina  
570 Schevzov, Stephen J Palmer, Edna C Hardeman, David Winlaw, Vivienne E Reeve,  
571 Ian Dixon, Wolfgang Weninger, Timothy P Cripe, and Peter W Gunning. A novel  
572 class of anticancer compounds targets the actin cytoskeleton in tumor cells. *Cancer*  
573 *Res*, 73(16):5169–82, Aug 2013. doi: 10.1158/0008-5472.CAN-12-4501.
- 574 [41] Yee Han Tee, Tom Shemesh, Visalatchi Thiagarajan, Rizal Fajar Hariadi, Karen L An-  
575 derson, Christopher Page, Niels Volkmann, Dorit Hanein, Sivaraj Sivaramakrishnan,  
576 Michael M Kozlov, and Alexander D Bershadsky. Cellular chirality arising from the  
577 self-organization of the actin cytoskeleton. *Nat Cell Biol*, 17(4):445–57, Apr 2015.  
578 doi: 10.1038/ncb3137.

- 579 [42] Timothy J Thauland and David C Parker. Diversity in immunological synapse struc-  
580 ture. *Immunology*, 131(4):466–72, Dec 2010. doi: 10.1111/j.1365-2567.2010.  
581 03366.x.
- 582 [43] P Anton van der Merwe and Omer Dushek. Mechanisms for T cell receptor trigger-  
583 ing. *Nat Rev Immunol*, 11(1):47–55, Jan 2011. doi: 10.1038/nri2887.
- 584 [44] A L Wells, A W Lin, L Q Chen, D Safer, S M Cain, T Hasson, B O Carragher, R A Mil-  
585 ligan, and H L Sweeney. Myosin VI is an actin-based motor that moves backwards.  
586 *Nature*, 401(6752):505–8, Sep 1999.
- 587 [45] Xufeng S Wu, Kang Rao, Hong Zhang, Fei Wang, James R Sellers, Lydia E Matesic,  
588 Neal G Copeland, Nancy A Jenkins, and John A Hammer. Identification of an or-  
589 ganelle receptor for myosin-va. *Nat Cell Biol*, 4(4):271–8, Apr 2002.
- 590 [46] Jianming Xie, Cristina M Tato, and Mark M Davis. How the immune system talks  
591 to itself: the varied role of synapses. *Immunol Rev*, 251(1):65–79, Jan 2013. doi:  
592 10.1111/imr.12017.
- 593 [47] Jason Yi, Xufeng S Wu, Travis Crites, and John A Hammer, 3rd. Actin retrograde  
594 flow and actomyosin ii arc contraction drive receptor cluster dynamics at the im-  
595 munological synapse in Jurkat T cells. *Mol Biol Cell*, 23(5):834–52, Mar 2012.
- 596 [48] Dennis Zimmermann, Alicja Santos, David R Kovar, and Ronald S Rock. Actin age  
597 orchestrates myosin-5 and myosin-6 run lengths. *Curr Biol*, 25(15):2057–62, Aug  
598 2015.
